# Supplementary material for: Genome-wide analyses of long noncoding RNA expression profiles in lung adenocarcinoma
Source: PubMed Central journal article supplement (PMC5681506; doi:10.1038/s41598-017-15712-y), 2017-11-10
Supplement: 41598_2017_15712_MOESM1_ESM.pdf [file 41598_2017_15712_MOESM1_ESM.pdf]

# Genome-wide analyses of long noncoding RNA expression profiles in lung adenocarcinoma

Zhenzi Peng<sup>1</sup>, Jun Wang<sup>1</sup>, Bin Shan<sup>2</sup>, Fulai Yuan<sup>1</sup>, Bin Li<sup>1</sup>, Yeping Dong<sup>1</sup>, Wei Peng<sup>1</sup>, Wenwen Shi<sup>1</sup>, Yuanda Cheng<sup>3</sup>, Yang Gao<sup>3</sup>, Chunfang Zhang<sup>3</sup> and Chaojun Duan<sup>\*1,3</sup>

<sup>1</sup>Institute of Medical Sciences, Xiangya Hospital, Central South University, Changsha 410008, PR China;

<sup>2</sup>College of Medical Sciences, Washington State University Spokane, WA 99201, USA.

<sup>3</sup>Department of Thoracic Surgery, Xiangya Hospital, Central South University, Changsha 410008, PR China;

[\\*duancjxy@126.com](mailto:duancjxy@126.com)

## **Supplementary information**

Supplementary Table S1 Differentially expressed lncRNAs.

Supplementary Table S2 Differentially expressed mRNAs.

Supplementary Table S3 Each lncRNAs GO enrichment.

Supplementary Table S4 Each lncRNAs KEGG enrichment.

Supplementary Table S5 Cis-regulated genes of lncRNAs.

Supplementary Table S6 POU2F2\_ and TRIM28\_LncRNAs\_Three-element relationship.

Supplementary Table S7 Clinical and phenotypical characteristics patients.

Supplementary Table S8 RNA quality assessment in the Agilent 2100 bioanalyzer.
